# Supplementary material
Source: publisher figshare collection journal article supplement (https://tandf.figshare.com/ndownloader/files/22488188)
Supplement: Supplementary file 1 [file 22488188]

**Electronic Supplementary Information**

**Magnetic retrieval of a switchable hydrophilicity solvent: Fast homogeneous liquid–liquid microextraction for the determination of benzophenone‐type UV filters in environmental waters**

Hasan Çabuk*,Onur Kavaracı

Zonguldak Bülent Ecevit University, Faculty of Arts and Sciences, Department of Chemistry, 67100, Zonguldak, TURKEY

**Corresponding author**: Dr. Hasan Çabuk,

Zonguldak Bülent Ecevit University, Faculty of Arts and Sciences, Department of Chemistry, 67100, Zonguldak, TURKEY

Tel.: 00 90 372 291 1920

Fax: 00 90 372 257 41 81

E**-**mail: cabukhasan@hotmail.com

**
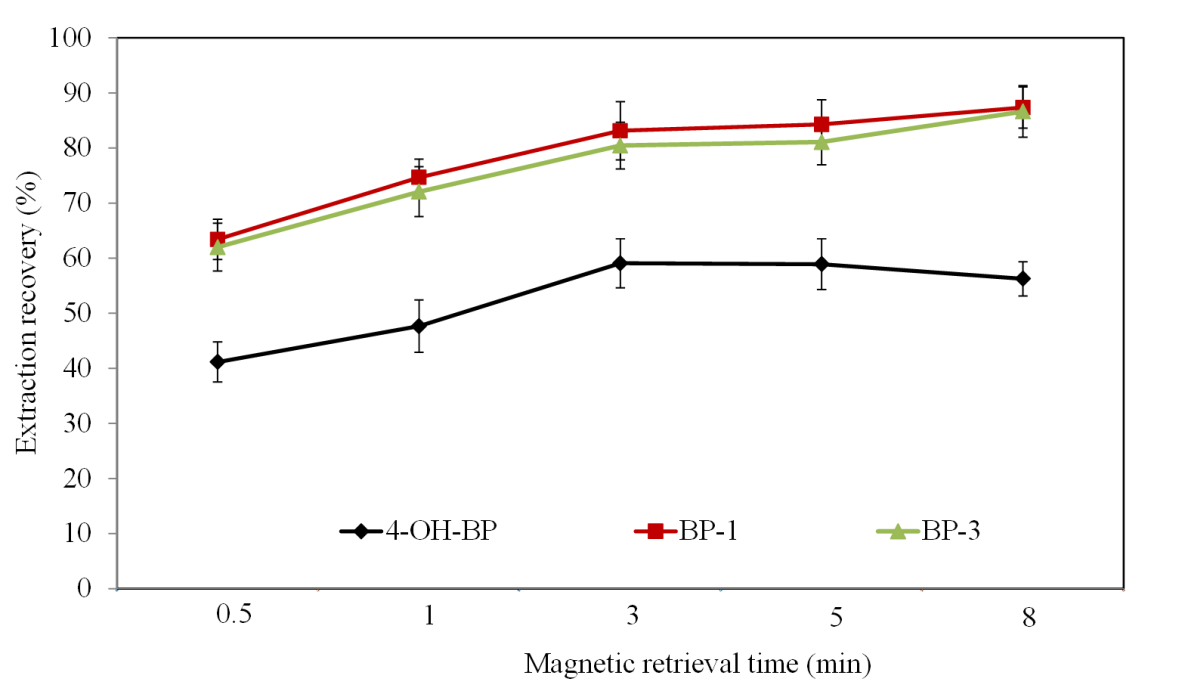
**

**Figure S1.** Effect of magnetic retrieval time. 6M HCl, 200 µL; DEHPA, 40 µL; Fe3O4 NPs, 40 mg; elution solvent and its volume, acetonitrile and 400 µL; elution time, 2 min; spike level, 125 µg L−1.

**
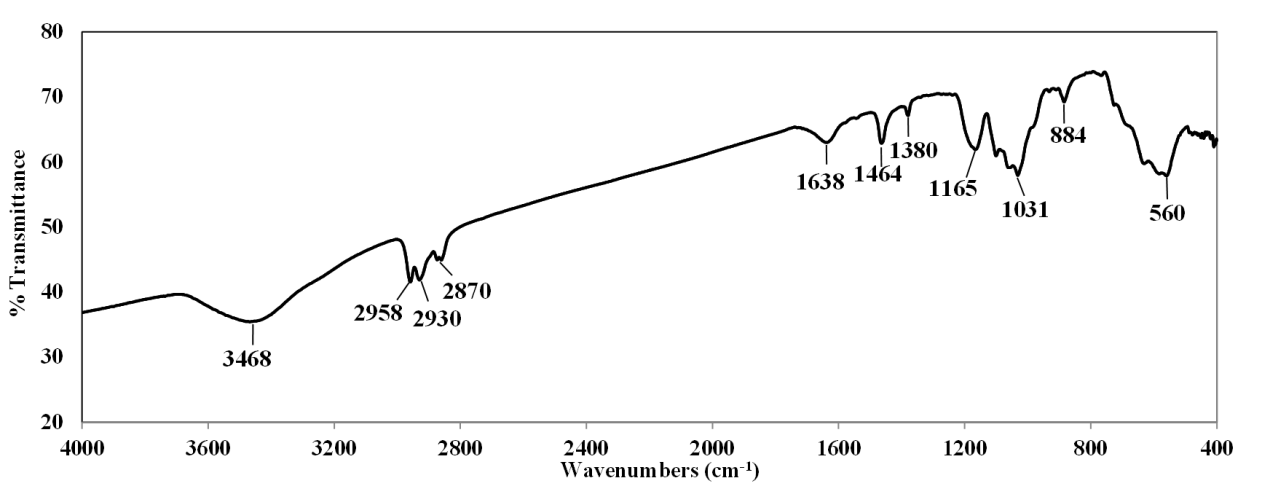
**

**Figure S2.** FT-IR spectra of Fe3O4-DEHPA complex after elution of analytes with acetonitrile.

**
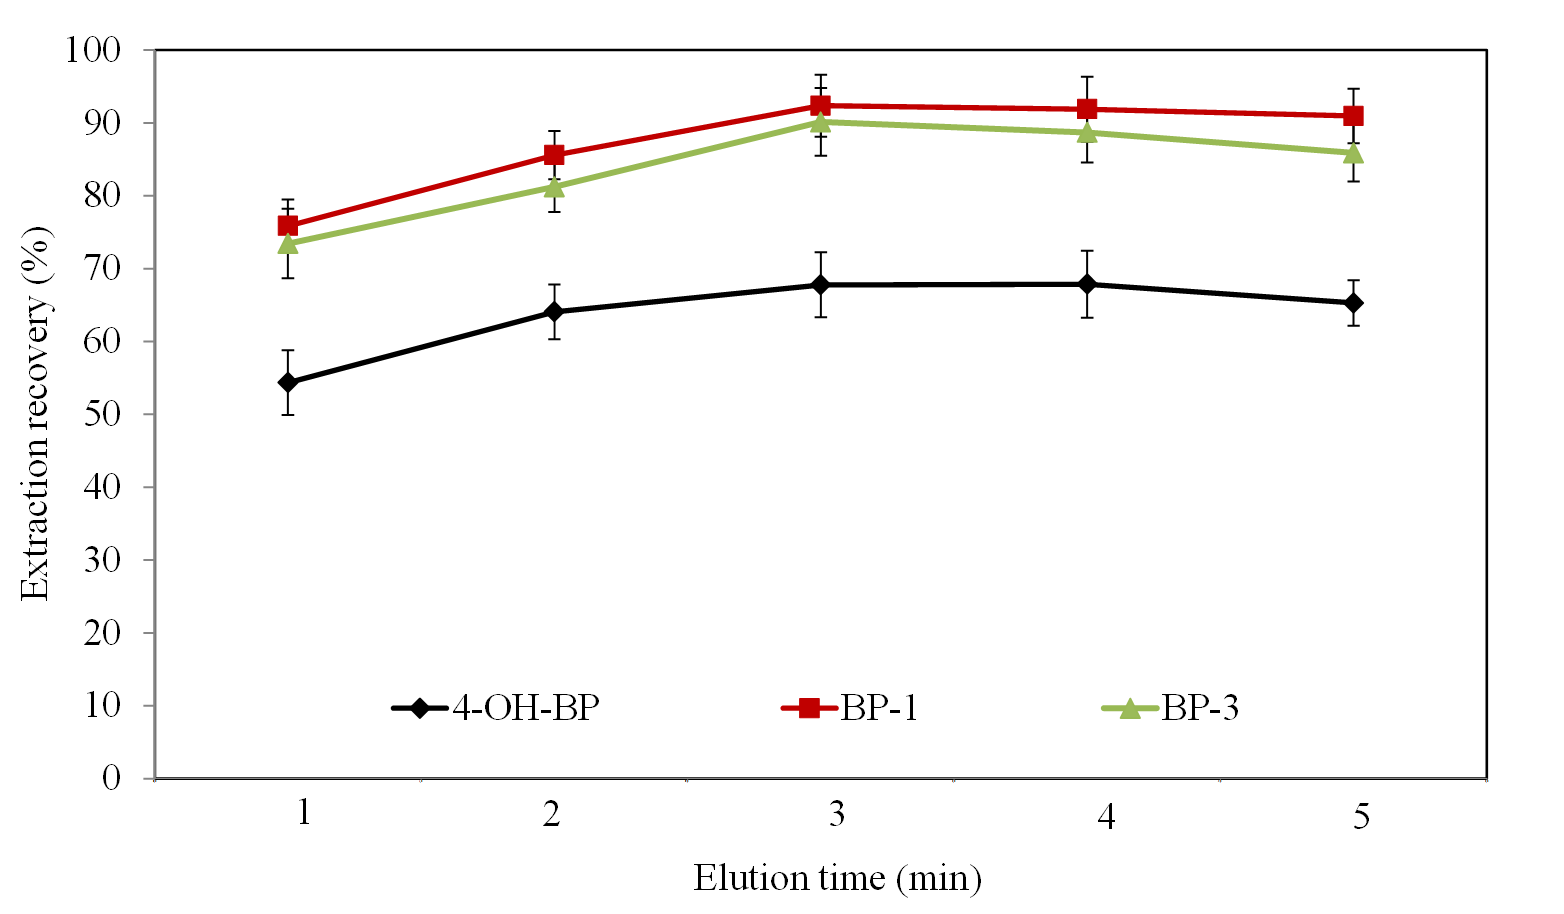
**

**Figure S3.** Effect of elution time. 6M HCl, 200 µL; DEHPA, 40 µL; Fe3O4 NPs, 40 mg; magnetic retrieval time, 3 min; elution solvent and its volume, acetonitrile and 300 µL; spike level, 125 µg L−1.

**
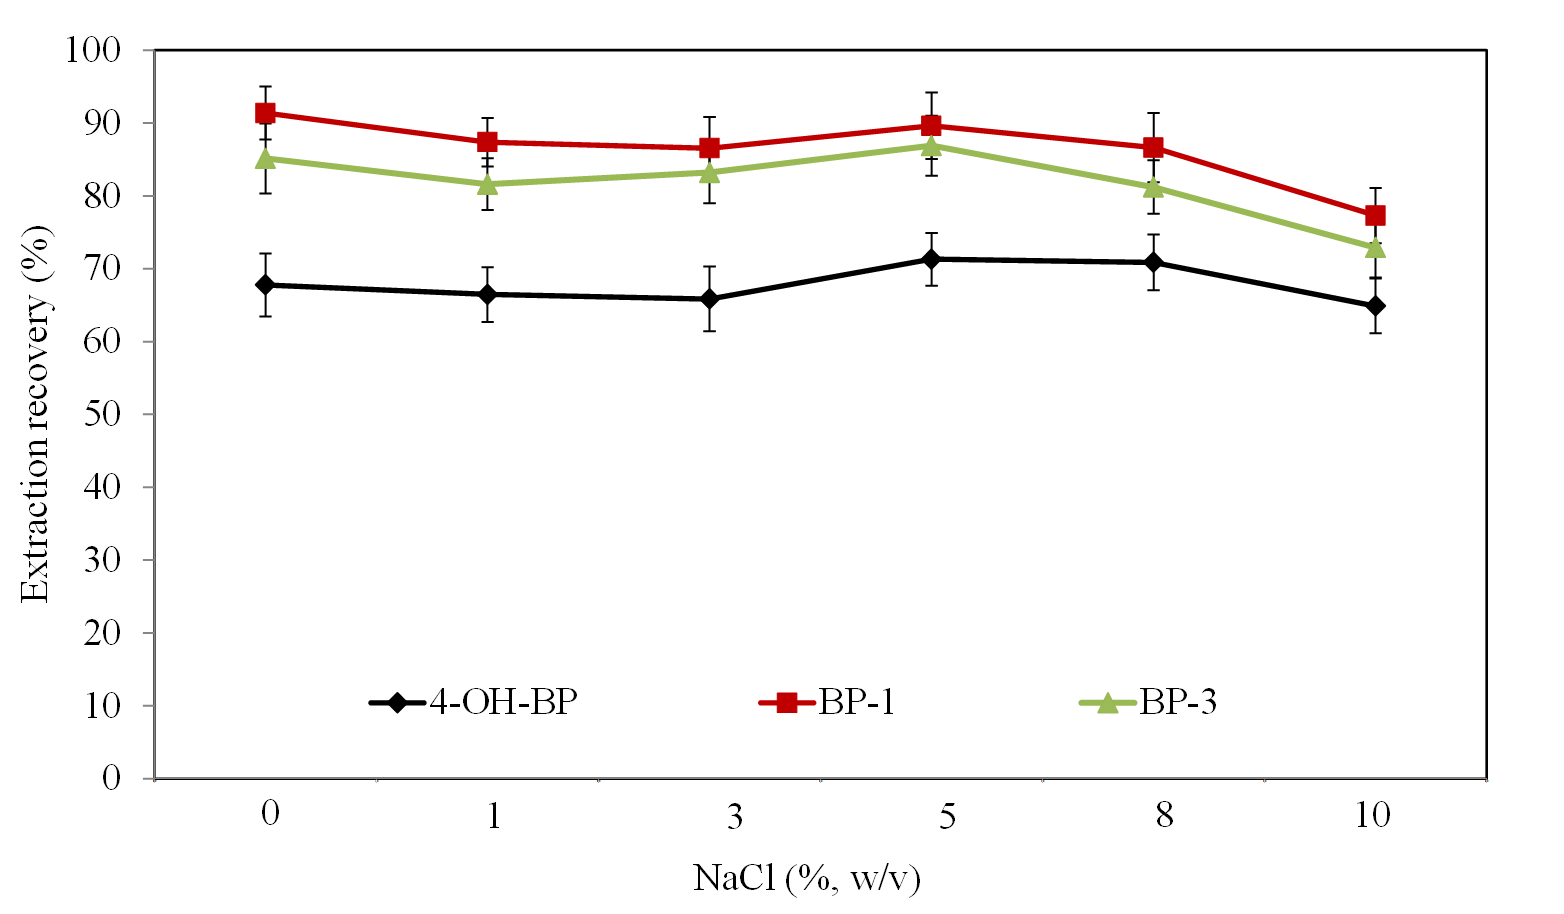
**

**Figure S4.** Effect of ionic strength. 6M HCl, 200 µL; DEHPA, 40 µL; Fe3O4 NPs, 40 mg; magnetic retrieval time, 3 min; elution solvent and its volume, acetonitrile and 300 µL; elution time, 3 min; spike level, 125 µg L−1.
